# Supplementary material
Source: Springer Nature journal article supplement (https://www.springermedizin.de/resource/supplementary/13024_2008_57_MOESM6_ESM.pdf/9643286)

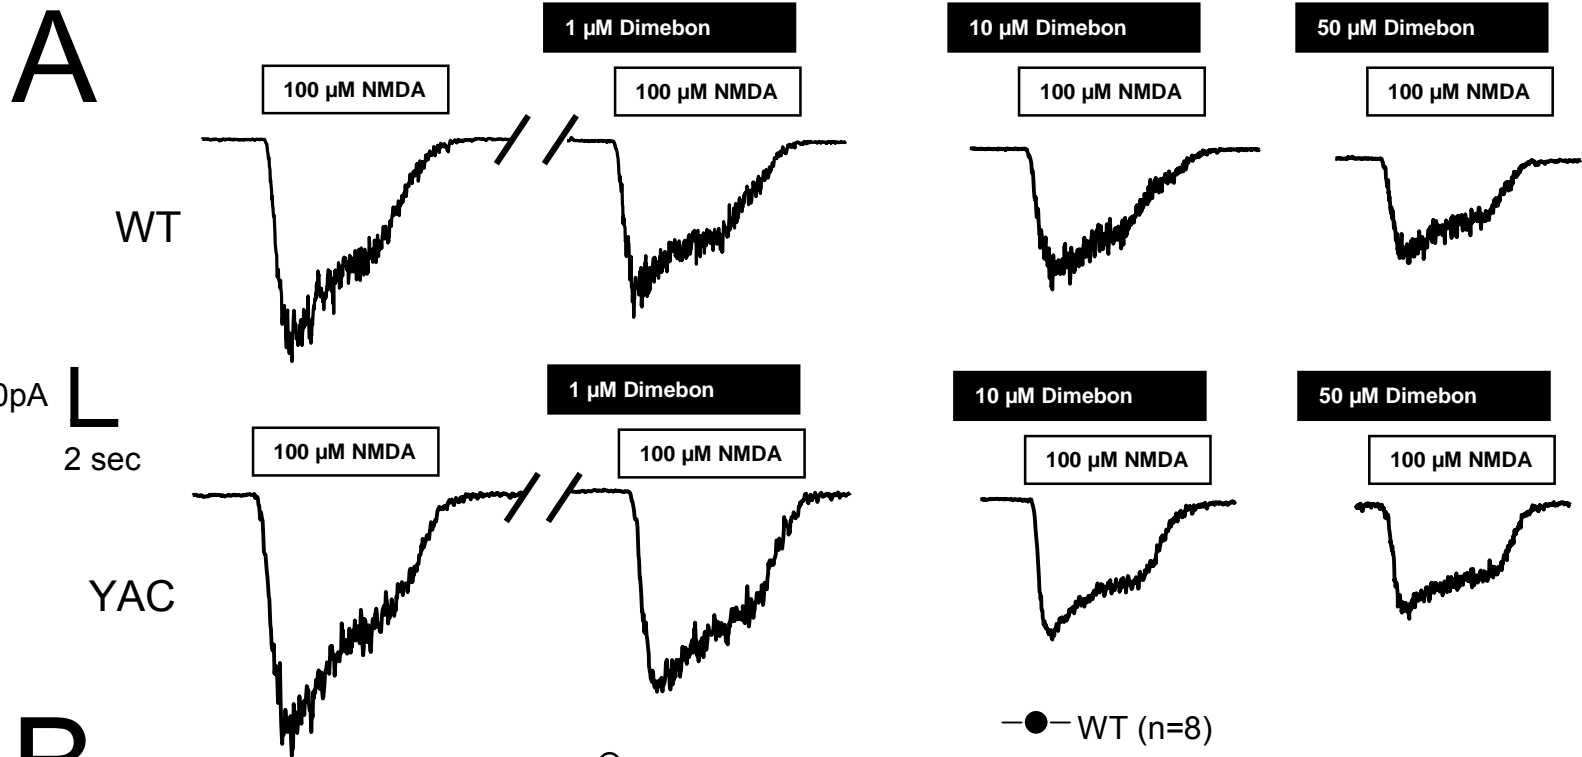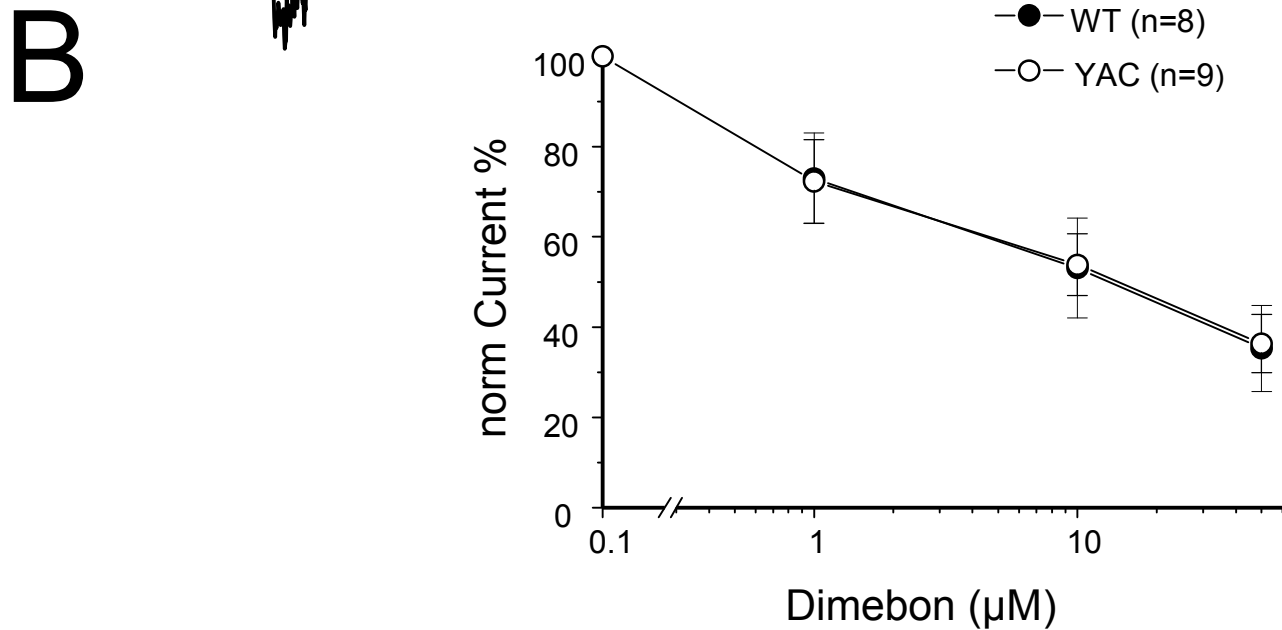

Supplement: MOESM6 [file 9643286]
